# Supplementary material for: Plant sphingolipids: Their importance in cellular organization and adaption
Source: PubMed Central journal article supplement (PMC4970446; doi:10.1016/j.bbalip.2016.04.003), 2016-09
Supplement: mmc1.pdf [file mmc1.pdf]

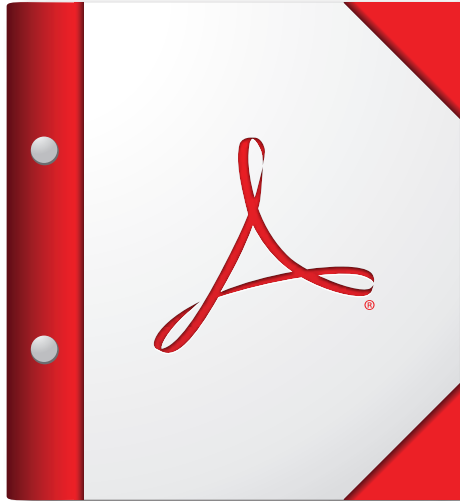

**For the best experience, open this PDF portfolio in  
Acrobat 9 or Adobe Reader 9, or later.**

[Get Adobe Reader Now!](#)
